# Supplementary material for: Deep whole-genome sequencing of multiple proband tissues and parental blood reveals the complex genetic etiology of congenital diaphragmatic hernias
Source: PubMed Central journal article supplement — HGG Adv. 2020 Aug 14;1(1):100008. doi: 10.1016/j.xhgg.2020.100008 (PMC7703690; doi:10.1016/j.xhgg.2020.100008), 2020-08-14
Supplement: NIHMS1642353-supplement-1.pdf [file NIHMS1642353-supplement-1.pdf]

**XHGG, Volume 1**

## **Supplemental Information**

**Deep whole-genome sequencing of multiple proband  
tissues and parental blood reveals the complex  
genetic etiology of congenital diaphragmatic hernias**

**Eric L. Bogenschutz, Zac D. Fox, Andrew Farrell, Julia Wynn, Barry Moore, Lan Yu, Gudrun Aspelund, Gabor Marth, Mark Yandell, Yufeng Shen, Wendy K. Chung, and Gabrielle Kardon**

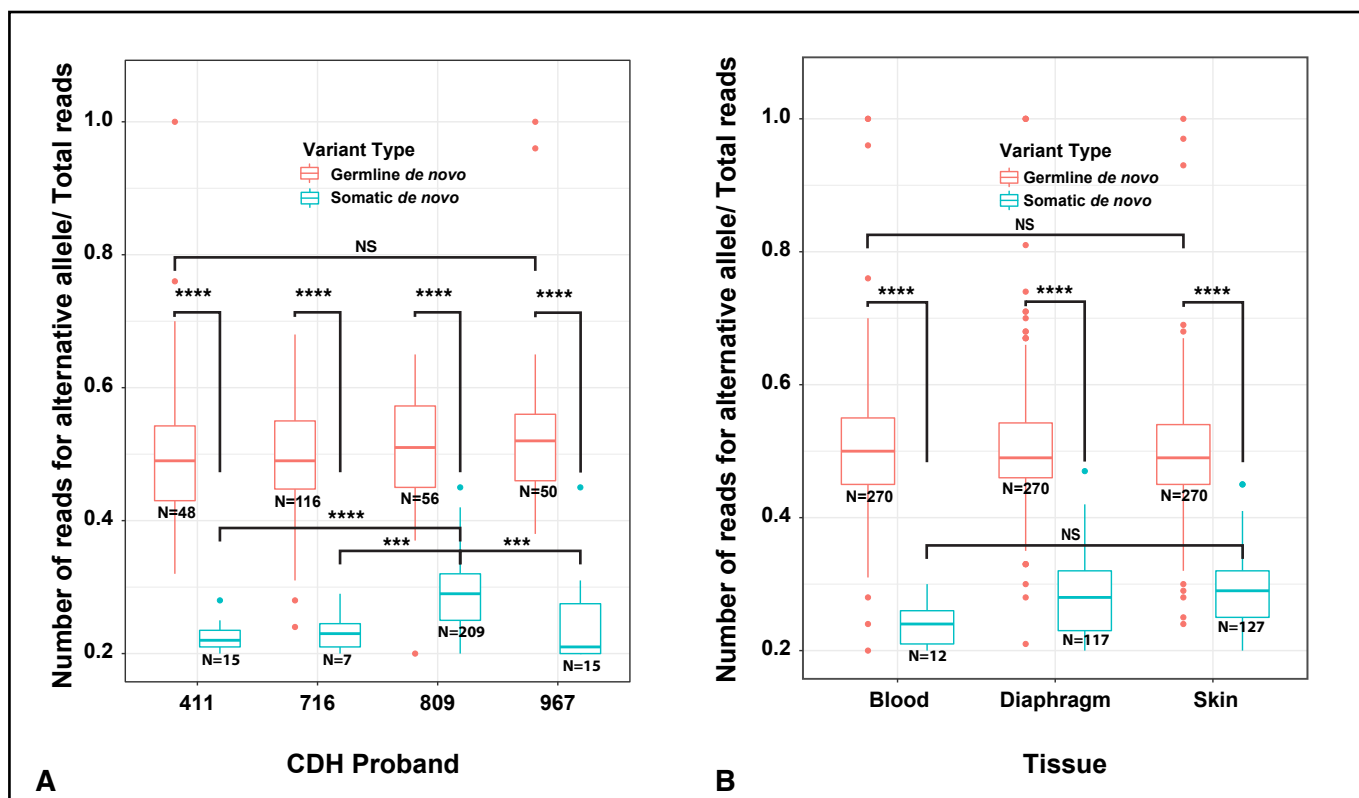

**Figure S1:** Alternative allele read depth of somatic *de novo* variants is significantly lower than germline *de novo* variants across CDH probands (A) and tissues (B). Box plots represent quartiles, with outliers as single points. One-way ANOVA with multiple comparisons used to test differences between somatic or germline *de novo* variants found across probands or tissues and unpaired t tests used to compare somatic and germline *de novo* variants within probands or tissues. NS- Not Significant, \*\*\*-  $P < 0.001$ , \*\*\*\*-  $P < 0.0001$ .

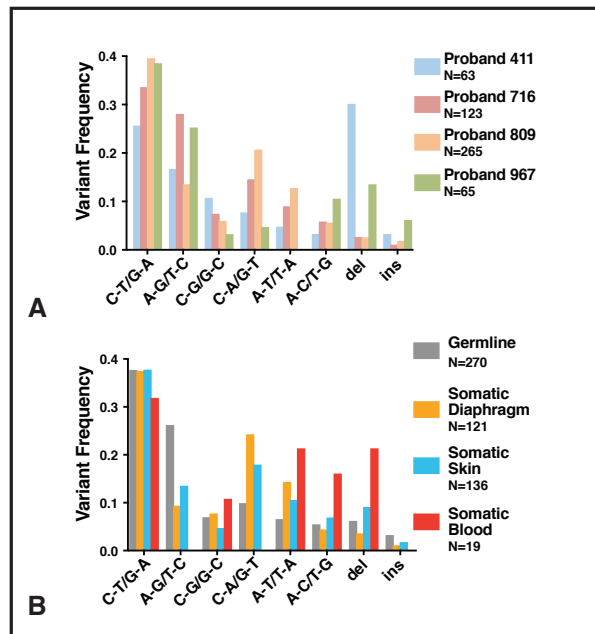

**Figure S2:** The spectrum of *de novo* variants varies between the different CDH probands (A), but does not vary widely between the three tissues sampled from the probands (B).
